1 **Challenges and opportunities in population monitoring of cheetahs**

2

3 Daniel W. Linden<sup>1\*</sup>, David S. Green<sup>2§\*</sup>, Elena V. Chelysheva<sup>3</sup>, Salim Mandela<sup>3</sup>, and Stephanie  
4 M. Dloniak<sup>2</sup>

5 <sup>1</sup> NOAA National Marine Fisheries Service, Greater Atlantic Regional Fisheries Office,  
6 Gloucester, MA 01930, USA

7 <sup>2</sup> Department of Integrative Biology, Michigan State University, East Lansing, MI, 45524, USA

8 <sup>3</sup> Mara-Meru Cheetah Project, Nairobi, Kenya

9

10 \* Corresponding author: [daniel.linden@noaa.gov](mailto:daniel.linden@noaa.gov)

11 § Current address: Institute for Natural Resources, Oregon State University, Corvallis, OR,  
12 97331, USA

13 \* These authors contributed equally.

14

15 **Keywords:** *Acinonyx jubatus*, cheetah, Masai Mara National Reserve, Mara-Serengeti  
16 ecosystem, non-invasive sampling, population monitoring, spatial-capture recapture

17 **Abstract**

18 Population monitoring is key to wildlife conservation and management but is challenging at the  
19 spatial and temporal extents necessary for understanding changes. Non-invasive survey methods  
20 and spatial capture-recapture (SCR) models have revolutionized wildlife monitoring by  
21 providing the means to more easily acquire data at large scales and the framework to generate  
22 spatially-explicit predictions, respectively. Despite the opportunities for improved monitoring,  
23 challenges can remain in the study design and model fitting phases of an SCR approach. Here,  
24 we used a search-encounter design with multi-session SCR models to collect spatially-indexed  
25 photographs and estimate the changes in density of cheetahs between 2005 and 2013–2016 in the  
26 Masai Mara National Reserve (MMNR) in southwestern Kenya. Our SCR models of cheetah  
27 encounters suggested little change in cheetah density from 2005 to 2013–2016, though there was  
28 some evidence that density fluctuated annually in the MMNR. The sampling period length (5 vs.  
29 10 months) and timing (early, late, full year) over which spatial encounters were included in the  
30 modeling did not substantially alter inferences about density when sample sizes were adequate  
31 (>20 spatially distinct encounters). We estimated an average cheetah density of  $\sim 1.2$   
32 cheetahs/100 km<sup>2</sup>, consistent with the impression that the MMNR provides important habitat for  
33 cheetahs in Africa. During most years and seasonal periods, the spatial distribution of vegetation  
34 greenness (a proxy for ungulate habitat quality) accounted for important variation in encounter  
35 rates. The search-encounter design used here could be applied to other regions for the purposes  
36 of cheetah monitoring. While snap-shot estimates of population size across time are useful for  
37 wildlife monitoring, open population models could identify the mechanisms behind changes and  
38 further facilitate better conservation and management decision making.

## 39 Introduction

40 Population monitoring is key to wildlife conservation and management but is challenging  
41 at the spatial and temporal extents necessary for understanding changes (Ellis et al. 2014).  
42 Monitoring over space and time requires a feasible scheme and persistence in both dedication  
43 and resources to obtain adequate information. Low replication in either dimension reduces the  
44 capacity to explain observed patterns or test hypotheses about perturbation, limiting the value of  
45 the monitoring data for informing conservation and management decisions (Yoccoz et al. 2001).  
46 The monitoring challenge has been particularly acute for wide-ranging, cryptic species that occur  
47 at low densities, such as carnivores. These life history features have historically made data  
48 collection and analysis difficult and reduced the opportunities for robust inference about  
49 population dynamics at relevant spatial and temporal scales (Karanth et al. 2006).

50 Non-invasive survey methods (Long et al. 2008) and spatial capture-recapture (SCR)  
51 models (Borchers and Efford 2008, Royle et al. 2014) have revolutionized wildlife population  
52 monitoring by providing the means to more easily acquire data at large scales and the framework  
53 to generate spatially-explicit predictions, respectively. In an SCR model, the locations of  
54 individual encounters (e.g., photographs, genetic material) are used to determine centers of  
55 activity for each observed individual, providing spatial information on the number of total  
56 individuals in the population and the probabilities of encountering them across the landscape.  
57 By formally linking the distributions of individuals and their movement ecology in a hierarchical  
58 framework, SCR models jointly estimate the ecological and observational processes that generate  
59 the spatial encounter data collected by large-scale monitoring designs, enabling robust inferences  
60 that are critical for conservation (Royle et al. 2018). These models have proven useful for  
61 estimating the density of wide-ranging carnivores, particularly in applications to large felids  
62 including tigers *Panthera tigris* (Royle et al. 2009), jaguars *Panthera onca* (Sollmann et al.  
63 2011), leopards *Panthera pardus* (Gray and Prum 2012) and cougars *Puma concolor* (Russell et  
64 al. 2012). Recently, the approach was illustrated using search-encounter surveys with African  
65 lions *Panthera leo* (Elliot and Gopaldaswamy 2017) and cheetahs *Acinonyx jubatus* (Broekhuis  
66 and Gopaldaswamy 2016). These applications have highlighted the potential of SCR as a  
67 monitoring tool, though rarely have studies spanned long enough timeframes to allow for  
68 examining temporal changes in population size or density at large scales (e.g., Chandler and  
69 Clark 2014).

70           Despite the opportunities for improved monitoring, challenges can remain in the study  
71 design and model fitting phases of a spatial capture-recapture approach. Sampling efforts may  
72 not yield enough unique spatial locations per individual to enable model fitting (Becker et al.  
73 2017), unless some type of auxiliary data is integrated (e.g., telemetry; Sollmann et al. 2013).  
74 Longer survey durations can be used to acquire more captures or encounters, at the expense of  
75 potentially violating assumptions regarding population closure (i.e., no births, deaths,  
76 immigrants/emigrants during sampling). The timing and duration of surveys will dictate the  
77 scope of the population being assessed, dependent on which individuals are available for  
78 sampling (e.g., residents vs. dispersers) and can meet assumptions of the observation process.  
79 Resource selection at one or more spatial scales can affect model inferences if not properly  
80 incorporated, particularly if it results in unmodeled heterogeneity in the encounter process  
81 (Royle et al. 2013, Linden et al. 2018). And small sample sizes, even when large enough to  
82 enable model fitting, may yet afford little power for accommodating relevant variation in one or  
83 more parameters which can reduce accuracy and precision of the resulting estimates (Sollmann  
84 et al. 2013). Most of these design and modeling considerations are important for any animal  
85 sampling and population estimation approach, and we note that explicitly modeling the sampling  
86 process does not necessarily obviate critical assumptions regarding how data were collected and  
87 what the data represent. For these reasons and others, it is prudent that researchers design robust  
88 monitoring schemes, use multiple lines of evidence, and temper any conclusions from  
89 monitoring data when making inferences that will guide conservation and management of large  
90 carnivore populations.

91           Here, we used a search-encounter design with SCR models (sensu Royle et al. 2011) to  
92 collect spatially-indexed photographs and estimate the changes in density of cheetahs between  
93 2005 and 2013–2016 in the Masai Mara National Reserve (MMNR) in southwestern Kenya.  
94 Cheetahs are currently listed globally as “vulnerable” with a decreasing total population (Durant  
95 et al. 2015, Durant et al. 2017) and while much of the current cheetah range exists outside of  
96 protected areas the populations within represent important strongholds for cheetah conservation  
97 (Durant et al. 2017). Few long-term studies have empirically estimated how cheetah populations  
98 are faring over time (Chauvenet et al. 2011, Durant et al. 2011), or have illustrated how changing  
99 landscapes around protected areas may be influencing wildlife within reserve boundaries.  
100 Carnivore populations in the MMNR have historically been high compared to other areas in sub-

101 Saharan Africa (Craft et al. 2015), and the Mara-Serengeti ecosystem is considered a stronghold  
102 for large carnivores in East Africa (Ogutu and Dublin 2002, Riggio et al. 2013). Yet,  
103 populations of wild herbivores in the MMNR have been declining over time (Ottichilo et al.  
104 2000, Ogutu et al. 2009, Ogutu et al. 2011), livestock often graze within reserve boundaries and  
105 anthropogenic disturbance has altered the behaviors and population numbers of other large  
106 carnivores (Boydston et al. 2003, Kolowski and Holekamp 2009, Green et al. 2018a), and  
107 rangelands around the MMNR are rapidly shifting into a matrix of urbanization and agriculture  
108 (Lamprey and Reid 2004, Løvschal et al. 2017).

109 Broekhuis and Gopaldaswamy (2016) recently provided a 2014 population estimate for  
110 cheetahs within the greater Mara using a similar survey and SCR modeling approach. We fit  
111 more extensive data from a multi-year survey effort (2005, 2013–2016) conducted during a  
112 longer sampling window (10 months) with sample sizes that afforded additional model  
113 complexity. In particular, we incorporated a resource selection function relating the probability  
114 of encounter to annual variance in green vegetation (i.e., Normalized Difference Vegetation  
115 Index [NDVI]) as an approximation to habitat quality for ungulate prey (Pettorelli et al. 2005,  
116 Bro-Jorgensen et al. 2008). We hypothesized that cheetahs would be encountered more  
117 frequently in areas with high variation where vegetation changed drastically across the year in  
118 response to moisture (e.g., short grass), compared to low variance regions with relatively  
119 constant conditions (e.g., riparian forest or bare ground). We also compared inferences between  
120 5-month (both an early and late season) and 10-month sampling periods to explore tradeoffs in  
121 the acquisition of encounters while trying to meet population closure assumptions.

122 Our earlier initial modeling efforts suggested a >50% decline in cheetah density between  
123 2005 and 2013 (Green et al. 2014), but the population estimate by Broekhuis and Gopaldaswamy  
124 (2016) challenged that conclusion. Additional years of monitoring and subsequent modeling  
125 indicate that the Mara cheetah population may exhibit annual fluctuations due to movement  
126 between the MMNR, adjacent conservancies, and the Serengeti National Park, highlighting the  
127 importance of conservation and management efforts in those areas surrounding the reserve.

128

## 129 **Materials and Methods**

### 130 *Study area and data collection*

131 Our study took place in the 1510 km<sup>2</sup> Masai Mara National Reserve in southwestern  
132 Kenya (Figure 1). The MMNR is predominantly comprised of open grassland interspersed with  
133 riparian areas, supporting a high density and diversity of resident herbivores, which are also  
134 joined seasonally by migrant populations of wildebeest *Connochaetes taurinus*, zebra *Equus*  
135 *quagga*, and Thomson's gazelle *Eudorcas thomsonii* from the Serengeti National Park to the  
136 southwest and the Loita plains to the northeast (Bell 1971, Stelfox et al. 1986, Sinclair and  
137 Norton-Griffiths 1995). The MMNR is bounded by the border with Tanzania and the Serengeti  
138 National Park to the south, and is surrounded in all other directions by community conservancies,  
139 pastoralist communities, small towns, and agricultural lands (Figure 1). There are no fences or  
140 barriers encompassing the MMNR, and wildlife regularly move beyond its political borders.

141 We systematically searched for cheetahs in the MMNR from January to October in 2005  
142 and each year during 2013–2016 by dividing the MMNR into 6 sampling blocks roughly equal in  
143 size (Figure S1). Searches occurred between 0500 and 1900 h, during which time observers (1  
144 or 2) drove throughout one block looking for cheetahs in a single vehicle, periodically stopping  
145 and scanning the surrounding landscape with binoculars (Caro 1994). Main roads were followed  
146 when convenient but considerable time was spent off-road to cover all accessible areas of each  
147 block; survey effort was calculated as the number of hours spent searching a block on a given  
148 date. When a cheetah was sighted, we drove within 50 m of an individual or group of  
149 individuals and photographed both sides of each animal and recorded geographic coordinates,  
150 sex and age class. We identified each individual using the distinct pelage and tail ring patterns  
151 (Caro and Durant 1991) and limited our modeling to adults.

152 We acquired spatial raster data from the Famine Early Warning System Network hosted  
153 by the USGS/EROS Data Center (<https://earlywarning.usgs.gov/fews/>). The data included  
154 250 m resolution grids with 10-day NDVI values observed across each year (36 for a given year)  
155 for a region spanning most of East Africa. We calculated the standard deviation in NDVI value  
156 within a given year to approximate the seasonal variation within a given grid cell. Notable  
157 features that are apparent in every year include the vegetation along the Mara and Talek Rivers  
158 (Figure S2).

159

160 *Spatial capture-recapture model*

161 Similar to previous applications of spatial capture-recapture using unstructured search-  
162 encounter designs (Russell et al. 2012, Broekhuis and Gopaldaswamy 2016), we divided our study  
163 area (the MMNR) into a grid with a sufficiently low resolution (2-km  $\times$  2-km cells) to create  
164 spatial encounter histories for individual cheetahs. We defined the number of encounters  $y_{ij}$  for  
165 individual  $i$  in grid cell  $j$  as a Poisson-distributed random variable:

166 
$$y_{ij} \sim \text{Poisson}(\lambda_{ij}g_{ij})$$

167 Here,  $\lambda_{ij}$  is the mean encounter rate for an individual having its activity center ( $s_i$ ) within a given  
168 grid cell, and  $g_{ij}$  is a detection function describing how encounter rate decreases as the distance  
169 ( $d_{ij}$ ) increases between the location of an individual's activity center and the coordinates of grid  
170 cell  $j$ . We chose a Gaussian encounter probability model such that  $g_{ij} = \exp(-d_{ij}^2/2\sigma^2)$ , where  $\sigma$  is  
171 a scale parameter representing the standard deviation of a bivariate normal distribution used to  
172 approximate space usage (Royle et al. 2014). While sex is often used as a factor for describing  
173 variation in  $\sigma$  (Sollmann et al. 2011, Broekhuis and Gopaldaswamy 2016), our early model fitting  
174 did not indicate a difference between females and males or among years;  $\sigma$  remained constant in  
175 our final model specification.

176 The mean encounter rate  $\lambda_{ij}$  was modeled as a function of several variables specific to an  
177 individual and grid cell. We considered differences among years to account for potential factors  
178 related to observers and the space-use of individual cheetahs in a given year. We also considered  
179 two grid cell covariates for  $\lambda_{ij}$ : 1) the annual variance in NDVI for each year (standardized within  
180 the year to have mean = 0 and unit variance); and 2) the log-transformed fraction of hours spent  
181 searching a grid cell, given its location within 1 of the 6 search blocks. We included quadratic  
182 functions for NDVI that were year-specific to accommodate resource selection by cheetahs in  
183 response to spatial-temporal differences in vegetation within the Mara across years. The effect  
184 of search effort was constrained similar to a Poisson offset, though we estimated a regression  
185 coefficient instead of assuming it was 1. As such, we modeled the log-linear encounter rate ( $\lambda_{ij}$ )  
186 as:

187 
$$\log(\lambda_{ij}) = \alpha_0 + \alpha_{1,\text{yr}} + \alpha_{2,\text{yr}} \text{NDVI}_{\text{yr}[i],j} + \alpha_{3,\text{yr}} \text{NDVI}_{\text{yr}[i],j}^2 + \alpha_4 \text{EFFORT}_{\text{yr}[i],j}$$

188 Here,  $\alpha_0$  is the baseline encounter rate on the log scale for an individual captured in 2005;  $\alpha_{1,\text{yr}}$  is  
189 a vector of year-specific coefficients for differences in encounter rates of individuals observed in

190 later years ( $yr[i] = 2013, 2014, 2015, \text{ or } 2016$ );  $\alpha_{2,yr}$  and  $\alpha_{3,yr}$  are vectors of year-specific  
191 coefficients for the linear and quadratic effects, respectively, of the variance in NDVI for each  
192 grid cell in each year; and  $\alpha_4$  is a coefficient describing the relationship between encounter rate  
193 and search effort in a given grid cell and year. We considered encounters separated by  $\geq 5$  days  
194 to represent independent events with regards to individual movement and encounter probability  
195 and, therefore, thinned 18–35% of the total encounters in a given year to help meet model  
196 assumptions. Adult male cheetahs regularly form coalitions with other males (Caro and Collins  
197 1987) and we observed them doing so in the MMNR (~60% of male sightings involved  
198 coalitions). Despite this, we treated each sighting as an independent observation given that  
199 coalitions were sometimes observed to exhibit fission-fusion dynamics and that the  
200 independence assumption for activity centers has been shown to be robust to departures (Reich  
201 and Gardner 2014).

202 We modeled the distribution of latent activity centers using an inhomogeneous point  
203 process (Borchers and Efford 2008) to estimate variation in cheetah density over the years. We  
204 expanded the 2-km resolution grid of the MMNR to include a 20-km buffer (Figure S1), which  
205 was large enough to ensure a negligible encounter probability at the edges (Royle et al. 2014);  
206 we also excluded the northwest escarpment, which was likely to have restricted cheetah  
207 movement (Broekhuis and Gopaldaswamy 2016). The total state space,  $S$ , of the point process  
208 therefore included 1,381 discrete grid cells for a total area of 5,524 km<sup>2</sup>. The intensity of the  
209 point process (i.e., the expected density) within a grid cell  $j$  in a given year was a log-linear  
210 function:

$$211 \quad \log(E(D_{j,yr})) = \beta_0 + \beta_{1,yr}$$

212 Here,  $\beta_0$  is the log-scale expected cheetah density in 2005, while  $\beta_{1,yr}$  is a vector of year-specific  
213 regression coefficients that estimate differences in expected density in later years ( $yr = 2013,$   
214 2014, 2015, or 2016). Conditional on the expected density for the year in which an individual  
215 was encountered ( $yr_i$ ), the probability of an individual's activity center being located within a  
216 given grid cell was defined as:

$$217 \quad \Pr(s_i = j | \boldsymbol{\beta}, yr_i) = \frac{E(D_{j,yr})}{\sum_j E(D_{j,yr})}$$



218 The marginal likelihood of the observations for each individual are then computed by integrating  
219 over all possible grid cells.

220

### 221 *Model fitting and sample period comparison*

222 We fit the model using the multi-session sex-structured SCR framework in the R package  
223  $\text{oSCR}$  (Sutherland et al. 2016) which maximizes the Poisson-integrated likelihood (Borchers and  
224 Efford 2008) and provides maximum likelihood estimates of model parameters. In addition to  
225 the parameters previously described,  $\text{oSCR}$  allows for estimating a sex ratio ( $\psi$ ). Without  
226 specification of sex-specific parameters in the other SCR model components, estimates of  $\psi$  are  
227 derived entirely from the observed sex ratios of encountered individuals during each session  
228 (here, session = year).

229 We compared several sampling periods (early 5 months, full 10 months, late 5 months) to  
230 examine how differences in the observed data and parameter estimates affected population  
231 inferences. The early period spanned Jan–May and corresponded to a mostly hot and dry season  
232 that turns into long and heavy rains by May. The late period spanned Jun–Oct and corresponded  
233 to the cool season that follows the heavy rain season, during which widespread green vegetation  
234 supports a massive ungulate migration (Bell 1971, Sinclair and Norton-Griffiths 1995). This late  
235 period was similar to the 3-month sampling design (August–October) used by Broekhuis and  
236 Gopalaswamy (2016). The full 10-month sampling period spanned most of the year (Jan–Oct)  
237 and, while facilitating more observations and larger sample sizes of individuals and spatial  
238 encounters, was likely to violate the assumption of population closure to a greater degree than  
239 the 5-month periods. Aside from differences in the density estimates across time we were  
240 particularly interested in how other model parameters might change with variation in the number  
241 and type of spatial encounters, including the estimated NDVI relationships with encounter rate,  
242 sex ratios, and individual movement scale.

243

## 244 **Results**

245 Monitoring efforts resulted in >7000 hours spent searching for and recording observations of  
246 cheetahs in the MMNR during 2005 and 2013–2016. The average number of hours searched  
247 each year was 1443 (range: 1086–1694) for the 10-month sampling period, which split into 623  
248 (range: 513–790) for the early 5-month period and 820 (range: 573–989) for the late 5-month

249 period (Table 1). Compared to either 5-month period, the increased sampling effort for the full  
250 10 months always resulted in greater numbers (within a given year) of unique individuals  
251 encountered (median across years: full = 32, early = 20, late = 23), total encounter events (full =  
252 101, early = 40, late = 60), and spatially distinct encounters (full = 58, early = 18, late = 28).  
253 The observed sex ratios were variable depending on the year and sampling period, though on a  
254 whole the median ratio was 1:1. We plotted the unique individuals encountered each year  
255 according to the midpoint ordinal date of their encounters, indicating the sampling period(s) in  
256 which they were observed (Figure 2). The patterns indicated similar ratios of females to males  
257 observed during all sampling period definitions.

258 The spatial capture-recapture models indicated similar patterns in density variation over  
259 time (Table 2–3; Figure 3), though fluctuations were mostly small relative to the uncertainty.  
260 The density estimates from 2005 had very large confidence intervals for the 5-month sampling  
261 periods due to small sample sizes. The full period density estimate (with 95% CI) for 2005 was  
262 1.62 (1.02–2.57) cheetahs/100 km<sup>2</sup>. During 2013–2016, mean estimated density ranged from  
263 0.60 (0.34–1.10) cheetahs/100 km<sup>2</sup> in 2013 to 1.63 (0.97–2.73) cheetahs/100 km<sup>2</sup> in 2014, and  
264 estimates matched closely across sampling periods within a given year. Precision of the density  
265 estimates was better for the 10-month sampling period, particularly with regards to the  
266 coefficients of variation (Table 3). Regardless of the sampling period, density estimates with a  
267 CV <0.30 could be achieved with >20 spatially distinct encounters (Figure 4).

268 The relationships between encounter rate and NDVI variance were variable across years  
269 and across sampling periods within a year (Table 2; Figure 5). For most years and sampling  
270 periods, the maximum encounter rates occurred at mid to high values of relative NDVI variance.  
271 The early period in 2016 was the primary exception, suggesting higher encounter rates for  
272 cheetahs in low variance areas during Jan–May. The hours spent searching a grid cell (given the  
273 survey block within which it was located) had a strong positive relationship with encounter rate,  
274 and average encounter rates were higher in later years (2013–2016) compared to 2005. The scale  
275 parameter of the half-normal distance function was much smaller for the early 5-month period ( $\sigma$   
276 = 4.9 km [4.4–5.4 km]) compared to the late 5-month period ( $\sigma$  = 8.1 km [7.2–9.2 km]) and the  
277 full 10-month period ( $\sigma$  = 7.0 km [6.4–7.5 km]).

278 The sex ratios were estimated to be largely even across all years and sampling periods as  
279 none of the logit-scale estimates were significantly different from 0 (Table 2), suggesting that the  
280 probability of an individual being a male did not vary considerably from 0.50.

281

## 282 **Discussion**

283 Effective wildlife population monitoring spans enough time and space to detect change or  
284 variation that may require further investigation or be targeted for management action. In  
285 addition to adequate spatial and temporal extents, the sampling intensity needs to produce  
286 enough observations to ensure reasonable precision from statistical models designed to estimate  
287 population parameters. Our spatial capture-recapture models of cheetah encounters suggested  
288 little change in cheetah density from 2005 to 2013–2016 in the Masai Mara National Reserve,  
289 though there was some evidence that density fluctuated annually in recent years. The sampling  
290 period length (5 vs. 10 months) and timing (early, late, full year) over which spatial encounters  
291 were included in the modeling did not substantially alter inferences about density when sample  
292 sizes were adequate (e.g.,  $\geq 20$  spatially distinct encounters). This suggests some flexibility in the  
293 design of search-encounter surveys for monitoring cheetahs over large landscapes.

294 We estimated an average cheetah density of  $\sim 1.2$  cheetahs/100 km<sup>2</sup>, consistent with the  
295 impression that the MMNR provides important habitat for cheetahs in Africa. Cheetah density  
296 varies extensively throughout the current species range, from 0.02 cheetahs/100 km<sup>2</sup> in areas of  
297 low productivity (Belbachir et al. 2015) to  $>2$  cheetahs/100 km<sup>2</sup> in the highly productive  
298 Serengeti (Durant et al. 2011, Durant et al. 2017). Broekhuis and Gopalaswamy (2016) used a  
299 similar search encounter design with SCR modeling and estimated a mean cheetah density of  
300  $\sim 1.3$  cheetahs/100 km<sup>2</sup> in the MMNR and surrounding conservancies in 2014, which is  
301 consistent with our 2014 estimate from the late period (1.37 cheetahs/100 km<sup>2</sup>). Our additional  
302 years of monitoring indicated that density in some years may be nearly half that which was  
303 estimated in 2014.

304 Long-term studies of cheetah population trends in the Mara-Serengeti ecosystem have  
305 indicated a relatively stable density in recent years (Chauvenet et al. 2011, Durant et al. 2011). If  
306 the density fluctuation we estimated during 2013–2016 represents a real ecological phenomenon,  
307 as opposed to sampling variability, then our comparison with 2005 is difficult to interpret, given  
308 that this single year could have represented either ebb or flow for the cheetah population.

309 Therefore, it is actually unclear whether cheetah density has declined in the MMNR during the  
310 past 10+ years. This uncertainty highlights the value of long-term monitoring programs, but also  
311 of monitoring designs that can estimate population size with useful precision. Our population  
312 modeling was limited to adult cheetahs and many individuals were encountered during only a  
313 portion of the year (Figure 2), therefore, population fluctuation in the MMNR is likely due to  
314 variable movement between the reserve and surrounding areas (e.g., Serengeti National Park).  
315 The magnitude of individual movements in cheetahs could make annual density an erratic  
316 statistic for an area the size of the MMNR (1510 km<sup>2</sup>), especially in the presence of non-resident,  
317 “floater” males (Caro 1994). Density estimation from SCR modeling is generally robust to  
318 transient individuals, though such movement dynamics could be explicitly modeled (Royle et al.  
319 2016).

320 Based on the estimate of  $\sigma$  from the distance function, the mean 95% space use or home  
321 range area ranged from ~450 to ~1,200 km<sup>2</sup> in the MMNR. Cheetah home ranges can be similar  
322 in size for males and females and overlap in areas where prey are non-migratory (Broomhall et  
323 al. 2003). In contrast, where ungulate prey are migratory, home ranges are comparatively larger  
324 with males forming small territories and females exhibiting roving behaviors (Caro 1994).  
325 Although there is a seasonal influx of migrant herbivores into the MMNR each year (Bell 1971,  
326 Stelfox et al. 1986, Sinclair and Norton-Griffiths 1995), resident herbivores are also present year-  
327 round in relatively high numbers. Thus, movements by cheetahs in the MMNR may be better  
328 predicted by interspecific competition with other large carnivores (Broekhuis et al. 2013) or the  
329 direct and indirect effects of people, rather than habitat suitability or prey populations. We  
330 caution any interpretation of the 95% space use approximation given the circular assumption of  
331 the bivariate normal distribution for  $\sigma$  (Royle et al. 2014). In addition, cheetah space use has  
332 been shown to be highly concentrated within a small portion of the home range (~14% of the  
333 total area), even for individuals that otherwise occupy large areas (Marker et al. 2008).

334 Several differences between our study and that of Broekhuis and Gopalaswamy (2016;  
335 hereafter, B&G) warrant discussion, given the similarity in our approaches to collecting and  
336 modeling spatial encounters of cheetahs in the Mara. First, B&G modeled the daily encounter  
337 probability over 90 days of sampling, while we summed our encounters over the relevant  
338 sampling period (5 or 10 months) and treated the counts as a Poisson random variable; given the  
339 low rates of encounter, these choices should have had a negligible influence (Royle et al. 2014).

340 Second, our definitions of effort differed and B&G's approach was preferable: using GPS tracks  
341 to define exactly which areas were searched. We did not have GPS track records for 2005 and  
342 instead attempted to systematically search pre-defined sections (i.e., blocks) of the MMNR for  
343 various lengths of time; such a definition of effort is approximate at best, though blocks were  
344 searched thoroughly when visited. Third, we observed a fairly even sex ratio of cheetahs that  
345 remained constant over the 5 years of surveys and is consistent with previous research in the  
346 Mara-Serengeti (Kelly et al. 1998). The extremely skewed ratio observed by B&G (F:M = 5:1)  
347 was potentially an artefact of a low sample size and short survey duration (3 months), though it  
348 should also be noted that most of their survey effort was in the conservancies to the north of the  
349 MMNR. Finally, B&G estimated a difference in the scale parameter ( $\sigma$ ) between females and  
350 males; early data exploration here did not support such differences in our study, both given the  
351 observed maximum distances moved and preliminary estimates of  $\sigma$  from models with sex-  
352 specific parameters. Despite these differences, the close similarity in cheetah density estimates  
353 provides empirical support to the robustness of SCR modeling (Royle et al. 2014).

354 Improvements to the design of our search-encounter survey could make the effort more  
355 efficient and useful in other parts of the species range. We thinned almost 1/3 of our observed  
356 cheetah encounters before fitting the SCR models because of uneven effort across space and  
357 time. Ideally, areas would be searched with regular periodicity to ensure that inferences  
358 regarding individual movement matched in temporal scale at all spatial locations. This is  
359 typically the case for other common methods of collecting spatial encounters (e.g., camera  
360 trapping), where traps are operated on regular intervals (Royle et al. 2014). The problem of  
361 sampling regularity would be most acute for transient individuals; for example, 5 consecutive  
362 days of effort in a given location could yield a very different collection of encounters than 5 days  
363 spread across several months. Uneven spatial sampling makes the interpretation of posterior  
364 density surfaces from SCR models especially problematic and prone to artefacts (Efford 2018a),  
365 relegating the identification of "hot spots" (e.g., Broekhuis and Gopaldaswamy 2016) to random  
366 error. Finally, the ability to traverse the landscape and get close enough to individuals for high  
367 quality photographs could limit the application of this survey to certain regions (e.g., protected  
368 areas). While long-range camera lenses may provide expanded opportunities for monitoring, it  
369 could still be difficult to clearly photograph both sides of every individual at great distances,  
370 ultimately increasing identification uncertainty (Augustine et al. 2018).

371 Other aspects of cheetah population ecology could be modeled with different or more  
372 complex analytical approaches to the individual encounter data we generated with the surveys.  
373 Our primary objective was a comparison between 2005 and 2013–2016, so we focused on  
374 understanding how best to estimate density within a given year (or seasonal period), while  
375 accommodating the sparse data from 2005. We hypothesized that individual space use and, thus,  
376 encounter probability would vary by habitat attributes and used NDVI variance as a proxy for  
377 ungulate habitat quality (Pettorelli et al. 2005, Bro-Jorgensen et al. 2008); in most years and  
378 seasonal periods, the spatial distribution of NDVI variance accounted for important variation in  
379 encounter rates. An open population model (Kendall et al. 1997) would allow for estimating  
380 survival and temporary emigration and potentially enable more comprehensive inferences than  
381 “snap-shot” density estimates (Harmsen et al. 2017). While open-population SCR models  
382 provide the opportunity to integrate spatial explicitness into estimation and prediction (e.g.,  
383 Green et al. 2018b), the Bayesian frameworks typically used for fitting such models are  
384 notoriously slow and computationally demanding for complex spatiotemporal inferences. New  
385 approaches using maximum likelihood and hidden Markov models could provide promising  
386 alternatives (Glennie et al. 2017, Efford 2018b). Snap-shot estimates of population size across  
387 time are useful for wildlife monitoring, but understanding the mechanisms behind population  
388 changes can facilitate better conservation and management decision making (Harmsen et al.  
389 2017).

390

### 391 **Acknowledgements**

392 We thank the Kenya Wildlife Service, the Office of the President of Kenya, the Senior  
393 Warden of the Masai Mara National Reserve, and Mr. Brian Heath for the permissions to carry  
394 out this research. We also thank Kay Holekamp for providing assistance in the field. SMD was  
395 supported by grants from the Lakeside Foundation, Mr. Paul L. Davies II, and Dalbit Petroleum  
396 Ltd. DSG was supported by a Graduate Research Fellowship from the National Science  
397 Foundation. This research is presented in memory of Mr. Paul L. Davies II.

398

### 399 **Authorship**

400 DWL, DSG, SMD, and EC designed the study. SMD, EC, and SM conducted the  
401 fieldwork, and DWL completed the modeling. All authors contributed to the manuscript writing.

402 **Data accessibility**

403 Data will be archived with Dryad Digital Repository.

404

405 **References**

406 Augustine, B. C., J. A. Royle, M. J. Kelly, C. B. Satter, R. S. Alonso, E. E. Boydston, and K. R.

407 Crooks. 2018. Spatial capture-recapture with partial identity: An application to camera  
408 traps. *Annals of Applied Statistics* 12:67-95.

409 Becker, M. S., S. M. Durant, F. G. R. Watson, M. Parker, D. Gottelli, J. M'soka, E. Droge, M.

410 Nyirenda, P. Schuette, S. Dunkley, and R. Brummer. 2017. Using dogs to find cats:  
411 detection dogs as a survey method for wide-ranging cheetah. *Journal of Zoology*  
412 302:184-192.

413 Belbachir, F., N. Pettorelli, T. Wachter, A. Belbachir-Bazi, and S. M. Durant. 2015. Monitoring  
414 rarity: the critically endangered Saharan cheetah as a flagship species for a threatened  
415 ecosystem. *Plos One* 10:e0115136.

416 Bell, R. H. 1971. A grazing ecosystem in the Serengeti. *Scientific American* 225:86-93.

417 Borchers, D. L. and M. G. Efford. 2008. Spatially explicit maximum likelihood methods for  
418 capture-recapture studies. *Biometrics* 64:377-385.

419 Boydston, E. E., K. M. Kapheim, H. E. Watts, M. Szykman, and K. E. Holekamp. 2003. Altered  
420 behaviour in spotted hyenas associated with increased human activity. Pages 207-219 *in*  
421 *Animal Conservation forum*. Cambridge University Press.

422 Bro-Jorgensen, J., M. E. Brown, and N. Pettorelli. 2008. Using the satellite-derived normalized  
423 difference vegetation index (NDVI) to explain ranging patterns in a lek-breeding  
424 antelope: the importance of scale. *Oecologia* 158:177-182.

425 Broekhuis, F., G. Cozzi, M. Valeix, J. W. McNutt, and D. W. Macdonald. 2013. Risk avoidance  
426 in sympatric large carnivores: reactive or predictive? *Journal of Animal Ecology*  
427 82:1098-1105.

428 Broekhuis, F. and A. M. Gopalaswamy. 2016. Counting Cats: Spatially Explicit Population  
429 Estimates of Cheetah (*Acinonyx jubatus*) Using Unstructured Sampling Data. *Plos One*  
430 11:e0153875.

431 Broomhall, L., M. Mills, and J. Du Toit. 2003. Home range and habitat use by cheetahs  
432 (*Acinonyx jubatus*) in the Kruger National Park. *Journal of Zoology* 261:119-128.

- 433 Caro, T. 1994. Cheetahs of the Serengeti Plains: group living in an asocial species. University of  
434 Chicago Press.
- 435 Caro, T. and D. Collins. 1987. Male cheetah social organization and territoriality. *Ethology*  
436 74:52-64.
- 437 Caro, T. and S. Durant. 1991. Use of quantitative analyses of pelage characteristics to reveal  
438 family resemblances in genetically monomorphic cheetahs. *Journal of Heredity* 82:8-14.
- 439 Chandler, R. B. and J. D. Clark. 2014. Spatially explicit integrated population models. *Methods*  
440 in *Ecology and Evolution* 5:1351-1360.
- 441 Chauvenet, A. L., S. M. Durant, R. Hilborn, and N. Pettorelli. 2011. Unintended consequences of  
442 conservation actions: managing disease in complex ecosystems. *Plos One* 6:e28671.
- 443 Craft, M. E., K. Hampson, J. O. Ogutu, and S. M. Durant. 2015. Carnivore communities in the  
444 greater Serengeti ecosystem. Pages 419-450 in A. R. E. Sinclair, K. L. Metzger, S. A. R.  
445 Mduma, and J. M. Fryxell, editors. *Serengeti IV: sustaining biodiversity in a coupled*  
446 *human-natural system*. The University of Chicago Press, Chicago, USA.
- 447 Durant, S., N. Mitchell, A. Ipavec, and R. Groom. 2015. *Acinonyx jubatus*. The IUCN Red List  
448 of Threatened Species 2015. e. T219A50649567.
- 449 Durant, S. M., M. E. Craft, R. Hilborn, S. Bashir, J. Hando, and L. Thomas. 2011. Long-term  
450 trends in carnivore abundance using distance sampling in Serengeti National Park,  
451 Tanzania. *Journal of Applied Ecology* 48:1490-1500.
- 452 Durant, S. M., N. Mitchell, R. Groom, N. Pettorelli, A. Ipavec, A. P. Jacobson, R. Woodroffe, M.  
453 Böhm, L. T. B. Hunter, M. S. Becker, F. Broekhuis, S. Bashir, L. Andresen, O.  
454 Aschenborn, M. Beddiaf, F. Belbachir, A. Belbachir-Bazi, A. Berbash, I. Brandao de  
455 Matos Machado, C. Breitenmoser, M. Chege, D. Cilliers, H. Davies-Mostert, A. J.  
456 Dickman, F. Ezekiel, M. S. Farhadinia, P. Funston, P. Henschel, J. Horgan, H. H. de  
457 Iongh, H. Jowkar, R. Klein, P. A. Lindsey, L. Marker, K. Marnewick, J. Melzheimer, J.  
458 Merkle, J. M'soka, M. Msuha, H. O'Neill, M. Parker, G. Purchase, S. Sahailou, Y. Saidu,  
459 A. Samna, A. Schmidt-Küntzel, E. Selebatso, E. A. Sogbohossou, A. Sulttan, E. Stone,  
460 E. van der Meer, R. van Vuuren, M. Wykstra, and K. Young-Overton. 2017. The global  
461 decline of cheetah *Acinonyx jubatus* and what it means for conservation. *Proceedings of*  
462 *the National Academy of Sciences* 114:528-533.



- 463 Efford, M. G. 2018a. Density surfaces in secr 3.1. <http://www.otago.ac.nz/density/pdfs/scr->  
464 [densitysurfaces.pdf](http://www.otago.ac.nz/density/pdfs/scr-densitysurfaces.pdf) Last Accessed 23 Feb 2018.
- 465 Efford, M. G. 2018b. openCR: Open Population Capture-Recapture. R package version 1.3.2.  
466 <https://cran.r-project.org/package=openCR>.
- 467 Elliot, N. B. and A. M. Gopalaswamy. 2017. Toward accurate and precise estimates of lion  
468 density. *Conservation Biology* 31:934-943.
- 469 Ellis, M. M., J. S. Ivan, and M. K. Schwartz. 2014. Spatially explicit power analyses for  
470 occupancy-based monitoring of wolverine in the U.S. Rocky Mountains. *Conservation*  
471 *Biology* 28:52-62.
- 472 Glennie, R., D. L. Borchers, M. Murchie, B. J. Harmsen, and R. J. Foster. 2017. Open population  
473 maximum likelihood spatial capture-recapture. Submitted to *Biometrics*.  
474 <http://hdl.handle.net/10023/11758>.
- 475 Gray, T. N. E. and S. Prum. 2012. Leopard density in post-conflict landscape, Cambodia:  
476 Evidence from spatially explicit capture-recapture. *Journal of Wildlife Management*  
477 76:163-169.
- 478 Green, D. S., L. Johnson-Ulrich, H. E. Couraud, and K. E. Holekamp. 2018a. Anthropogenic  
479 disturbance induces opposing population trends in spotted hyenas and African lions.  
480 *Biodiversity and Conservation* 27:871-889.
- 481 Green, D. S., D. W. Linden, E. V. Chelysheva, and S. M. Dloniak. 2014. Estimating changes in  
482 cheetah density and distribution in the Mara-Serengeti ecosystem with spatial capture-  
483 recapture (SCR). The Wildlife Society 21st Annual Conference, Pittsburgh, PA. DOI:  
484 10.13140/RG.2.2.34678.86086.
- 485 Green, D. S., S. M. Matthews, R. C. Swiers, R. L. Callas, J. Scott Yaeger, S. L. Farber, M. K.  
486 Schwartz, and R. A. Powell. 2018b. Dynamic occupancy modelling reveals a hierarchy of  
487 competition among fishers, grey foxes and ringtails. *Journal of Animal Ecology* 87:813-  
488 824.
- 489 Harmsen, B. J., R. J. Foster, E. Sanchez, C. E. Gutierrez-González, S. C. Silver, L. E. T. Ostro,  
490 M. J. Kelly, E. Kay, and H. Quigley. 2017. Long term monitoring of jaguars in the  
491 Cockscomb Basin Wildlife Sanctuary, Belize; Implications for camera trap studies of  
492 carnivores. *Plos One* 12:e0179505.

- 493 Karanth, K. U., J. D. Nichols, N. S. Kumar, and J. E. Hines. 2006. Assessing tiger population  
494 dynamics using photographic capture–recapture sampling. *Ecology* 87:2925-2937.
- 495 Kelly, M. J., M. K. Laurenson, C. D. FitzGibbon, D. A. Collins, S. M. Durant, G. W. Frame, B.  
496 C. Bertram, and T. Caro. 1998. Demography of the Serengeti cheetah (*Acinonyx jubatus*)  
497 population: the first 25 years. *Journal of Zoology* 244:473-488.
- 498 Kendall, W. L., J. D. Nichols, and J. E. Hines. 1997. Estimating temporary emigration using  
499 capture–recapture data with Pollock’s robust design. *Ecology* 78:563-578.
- 500 Kolowski, J. and K. Holekamp. 2009. Ecological and anthropogenic influences on space use by  
501 spotted hyaenas. *Journal of Zoology* 277:23-36.
- 502 Lamprey, R. H. and R. S. Reid. 2004. Expansion of human settlement in Kenya's Maasai Mara:  
503 what future for pastoralism and wildlife? *Journal of Biogeography* 31:997-1032.
- 504 Linden, D. W., A. P. K. Sirén, and P. J. Pekins. 2018. Integrating telemetry data into spatial  
505 capture–recapture modifies inferences on multi-scale resource selection. *Ecosphere*  
506 9:e02203.
- 507 Long, R. A., P. MacKay, J. Ray, and W. Zielinski. 2008. Noninvasive survey methods for  
508 carnivores. Island Press, Washington, DC, USA.
- 509 Løvschal, M., P. K. Bøcher, J. Pilgaard, I. Amoke, A. Odingo, A. Thuo, and J.-C. Svenning.  
510 2017. Fencing bodes a rapid collapse of the unique Greater Mara ecosystem. *Scientific*  
511 *Reports* 7:41450.
- 512 Marker, L., A. Dickman, M. G. Mills, R. Jeo, and D. W. Macdonald. 2008. Spatial ecology of  
513 cheetahs on north-central Namibian farmlands. *Journal of Zoology* 274:226-238.
- 514 Ogutu, J. and H. Dublin. 2002. Demography of lions in relation to prey and habitat in the Maasai  
515 Mara National Reserve, Kenya. *African Journal of Ecology* 40:120-129.
- 516 Ogutu, J. O., N. Owen-Smith, H. P. Piepho, and M. Y. Said. 2011. Continuing wildlife  
517 population declines and range contraction in the Mara region of Kenya during 1977-  
518 2009. *Journal of Zoology* 285:99-109.
- 519 Ogutu, J. O., H. P. Piepho, H. Dublin, N. Bhola, and R. S. Reid. 2009. Dynamics of Mara–  
520 Serengeti ungulates in relation to land use changes. *Journal of Zoology* 278:1-14.
- 521 Ottichilo, W. K., J. De Leeuw, A. K. Skidmore, H. H. Prins, and M. Y. Said. 2000. Population  
522 trends of large non-migratory wild herbivores and livestock in the Masai Mara  
523 ecosystem, Kenya, between 1977 and 1997. *African Journal of Ecology* 38:202-216.

- 524 Pettorelli, N., J. O. Vik, A. Mysterud, J. M. Gaillard, C. J. Tucker, and N. C. Stenseth. 2005.  
525 Using the satellite-derived NDVI to assess ecological responses to environmental change.  
526 Trends in Ecology & Evolution 20:503-510.
- 527 Reich, B. J. and B. Gardner. 2014. A spatial capture-recapture model for territorial species.  
528 Environmetrics 25:630-637.
- 529 Riggio, J., A. Jacobson, L. Dollar, H. Bauer, M. Becker, A. Dickman, P. Funston, R. Groom, P.  
530 Henschel, and H. de Iongh. 2013. The size of savannah Africa: a lion's (Panthera leo)  
531 view. Biodiversity and Conservation 22:17-35.
- 532 Royle, J. A., R. B. Chandler, R. Sollmann, and B. Gardner. 2014. Spatial capture-recapture.  
533 Academic Press, Waltham, MA, USA.
- 534 Royle, J. A., R. B. Chandler, C. C. Sun, and A. K. Fuller. 2013. Integrating resource selection  
535 information with spatial capture-recapture. Methods in Ecology and Evolution 4:520-530.
- 536 Royle, J. A., A. K. Fuller, and C. Sutherland. 2016. Spatial capture-recapture models allowing  
537 Markovian transience or dispersal. Population Ecology 58:53-62.
- 538 Royle, J. A., A. K. Fuller, and C. Sutherland. 2018. Unifying population and landscape ecology  
539 with spatial capture-recapture. Ecography 41:444-456.
- 540 Royle, J. A., K. U. Karanth, A. M. Gopalaswamy, and N. S. Kumar. 2009. Bayesian inference in  
541 camera trapping studies for a class of spatial capture-recapture models. Ecology 90:3233-  
542 3244.
- 543 Royle, J. A., M. Kéry, and J. Guelat. 2011. Spatial capture-recapture models for search-  
544 encounter data. Methods in Ecology and Evolution 2:602-611.
- 545 Russell, R. E., J. A. Royle, R. Desimone, M. K. Schwartz, V. L. Edwards, K. P. Pilgrim, and K.  
546 S. McKelvey. 2012. Estimating abundance of mountain lions from unstructured spatial  
547 sampling. Journal of Wildlife Management 76:1551-1561.
- 548 Sinclair, A. R. E. and M. Norton-Griffiths. 1995. Serengeti: dynamics of an ecosystem.  
549 University of Chicago Press.
- 550 Sollmann, R., M. M. Furtado, B. Gardner, H. Hofer, A. T. A. Jacomo, N. M. Torres, and L.  
551 Silveira. 2011. Improving density estimates for elusive carnivores: Accounting for sex-  
552 specific detection and movements using spatial capture-recapture models for jaguars in  
553 central Brazil. Biological Conservation 144:1017-1024.

- 554 Sollmann, R., B. Gardner, R. B. Chandler, D. B. Shindle, D. P. Onorato, J. A. Royle, and A. F.  
555 O'Connell. 2013. Using multiple data sources provides density estimates for endangered  
556 Florida panther. *Journal of Applied Ecology* 50:961-968.
- 557 Stelfox, J. G., D. G. Peden, H. Epp, R. J. Hudson, S. W. Mbugua, J. L. Agatsiva, and C. L.  
558 Amuyunzu. 1986. Herbivore dynamics in southern Narok, Kenya. *The Journal of*  
559 *Wildlife Management* 50:339-347.
- 560 Sutherland, C., J. A. Royle, and D. W. Linden. 2016. oSCR: Multi-Session Sex-Structured  
561 Spatial Capture-Recapture Models. R package version 0.30.1.  
562 <https://github.com/jaroyale/oSCR>.
- 563 Yoccoz, N. G., J. D. Nichols, and T. Boulinier. 2001. Monitoring of biological diversity in space  
564 and time. *Trends in Ecology & Evolution* 16:446-453.
- 565

566 **Tables**

567 Table 1. Summary of monitoring effort and adult cheetah encounters in the Masai Mara National  
 568 Reserve during 2005 and 2013–2016. Results from the 3 sampling periods (early 5 months [Jan–  
 569 May], full 10 months [Jan–Oct], and late 5 months [Jun–Oct]) include the hours spent searching,  
 570 the number of unique individuals encountered (n) and broken down by sex (F/M), and the  
 571 number of encounter events (y). Spatially distinct encounters occur across >1 grid cell and by  
 572 definition involve recapture of an individual. For example, in 2005 there were 23 individuals  
 573 encountered during the early 5-month period but only 8 (4 female; 4 male) were encountered in  
 574 >1 grid cell.

| Months       | Year | Hrs  | Total encounters |     | Spatially distinct encounters |     |
|--------------|------|------|------------------|-----|-------------------------------|-----|
|              |      |      | n (F/M)          | y>0 | n (F/M)                       | y>1 |
| 5 (Jan–May)  | 2005 | 513  | 23 (12/11)       | 34  | 8 (4/4)                       | 11  |
|              | 2013 | 790  | 12 (6/6)         | 34  | 6 (3/3)                       | 18  |
|              | 2014 | 530  | 20 (10/10)       | 40  | 13 (8/5)                      | 19  |
|              | 2015 | 705  | 24 (11/13)       | 68  | 12 (6/6)                      | 39  |
|              | 2016 | 578  | 20 (12/8)        | 41  | 7 (6/1)                       | 16  |
| 10 (Jan–Oct) | 2005 | 1086 | 26 (14/12)       | 47  | 14 (7/7)                      | 21  |
|              | 2013 | 1535 | 20 (10/10)       | 73  | 13 (9/4)                      | 46  |
|              | 2014 | 1465 | 34 (14/20)       | 112 | 26 (12/14)                    | 73  |
|              | 2015 | 1694 | 32 (13/19)       | 142 | 19 (10/9)                     | 92  |
|              | 2016 | 1438 | 32 (17/15)       | 101 | 22 (12/10)                    | 58  |
| 5 (Jun–Oct)  | 2005 | 573  | 11 (7/4)         | 13  | 2 (0/2)                       | 2   |
|              | 2013 | 745  | 15 (10/5)        | 39  | 8 (6/2)                       | 22  |
|              | 2014 | 935  | 30 (13/17)       | 72  | 17 (5/12)                     | 39  |
|              | 2015 | 989  | 23 (10/13)       | 74  | 12 (7/5)                      | 45  |
|              | 2016 | 860  | 27 (14/13)       | 60  | 14 (9/5)                      | 28  |

575 Table 2. Parameter estimates from the spatial capture-recapture models of adult cheetah  
 576 encounters in 2005 and 2013–2016 in the Masai Mara National Reserve, fit to data from the  
 577 early period (Jan–May), full period (Jan–Oct), and late period (Jun–Oct). Estimates are on the  
 578 scale of the appropriate link function, either log ( $\alpha$ ,  $\beta$ ) or logit ( $\psi$ ).

| Process   | $\theta$          | Effect                  | early (Jan–May) |       | full (Jan–Oct) |       | late (Jun–Oct) |        |
|-----------|-------------------|-------------------------|-----------------|-------|----------------|-------|----------------|--------|
|           |                   |                         | Estimate        | SE    | Estimate       | SE    | Estimate       | SE     |
| Encounter | $\alpha_0$        | Intercept               | −3.915          | 0.362 | −4.277         | 0.301 | −5.345         | 0.756  |
|           | $\alpha_{1,2013}$ | Year                    | 1.261           | 0.459 | 0.784          | 0.319 | 1.732          | 0.790  |
|           | $\alpha_{1,2014}$ |                         | 0.730           | 0.454 | 0.945          | 0.302 | 1.648          | 0.778  |
|           | $\alpha_{1,2015}$ |                         | 1.089           | 0.408 | 0.998          | 0.303 | 1.660          | 0.782  |
|           | $\alpha_{1,2016}$ |                         | 1.373           | 0.445 | 0.850          | 0.308 | 1.075          | 0.786  |
|           | $\alpha_{2,2005}$ |                         | NDVI×Year       | 1.284 | 0.485          | 0.366 | 0.232          | −0.560 |
|           | $\alpha_{2,2013}$ | 1.167                   |                 | 0.393 | 0.709          | 0.252 | 0.621          | 0.344  |
|           | $\alpha_{2,2014}$ | −1.684                  |                 | 0.491 | −0.157         | 0.155 | 0.254          | 0.196  |
|           | $\alpha_{2,2015}$ | 0.961                   |                 | 0.335 | 0.775          | 0.219 | 0.580          | 0.297  |
|           | $\alpha_{2,2016}$ | −0.413                  |                 | 0.247 | 0.143          | 0.148 | 0.823          | 0.298  |
|           | $\alpha_{3,2005}$ | NDVI <sup>2</sup> ×Year | −0.920          | 0.397 | −0.369         | 0.225 | −0.245         | 0.382  |
|           | $\alpha_{3,2013}$ |                         | −0.675          | 0.392 | −0.731         | 0.284 | −0.879         | 0.442  |
|           | $\alpha_{3,2014}$ |                         | −1.569          | 0.458 | −0.609         | 0.174 | −0.636         | 0.230  |
|           | $\alpha_{3,2015}$ |                         | −0.377          | 0.228 | −0.257         | 0.145 | −0.130         | 0.187  |
|           | $\alpha_{3,2016}$ |                         | −0.408          | 0.219 | −0.127         | 0.125 | −0.236         | 0.211  |
|           | $\alpha_4$        | Effort                  | 0.874           | 0.151 | 0.703          | 0.130 | 0.691          | 0.149  |
|           | $\log(\sigma)$    | Dist. scale             | 1.583           | 0.055 | 1.940          | 0.039 | 2.094          | 0.065  |
| Density   | $\beta_0$         | Intercept               | −2.243          | 0.291 | −2.732         | 0.236 | −2.760         | 0.682  |
|           | $\beta_{1,2013}$  | Year                    | −1.474          | 0.418 | −0.668         | 0.328 | −0.791         | 0.735  |
|           | $\beta_{1,2014}$  |                         | −0.491          | 0.389 | −0.146         | 0.294 | −0.147         | 0.709  |
|           | $\beta_{1,2015}$  |                         | −0.867          | 0.358 | −0.415         | 0.295 | −0.659         | 0.714  |
|           | $\beta_{1,2016}$  |                         | −0.904          | 0.379 | −0.316         | 0.297 | −0.246         | 0.714  |
| Sex ratio | $\psi_{2005}$     | Pr(M)×Year              | −0.087          | 0.417 | −0.154         | 0.393 | −0.560         | 0.627  |
|           | $\psi_{2013}$     |                         | 0.000           | 0.577 | 0.000          | 0.447 | −0.693         | 0.548  |
|           | $\psi_{2014}$     |                         | 0.000           | 0.447 | 0.357          | 0.348 | 0.268          | 0.368  |
|           | $\psi_{2015}$     |                         | 0.167           | 0.410 | 0.379          | 0.360 | 0.262          | 0.421  |
|           | $\psi_{2016}$     |                         | −0.405          | 0.456 | −0.125         | 0.354 | −0.074         | 0.385  |

579 Table 3. Mean estimates (with standard errors and coefficients of variation) of cheetah density  
580 (#/100 km<sup>2</sup>) from the spatial capture-recapture models of adult cheetah encounters in 2005 and  
581 2013–2016 in the Masai Mara National Reserve, fit to data from the early period (Jan–May), full  
582 period (Jan–Oct), and late period (Jun–Oct).

| Year | early (Jan–May) |      |      | full (Jan–Oct) |      |      | late (Jun–Oct) |      |      |
|------|-----------------|------|------|----------------|------|------|----------------|------|------|
|      | Mean            | SE   | CV   | Mean           | SE   | CV   | Mean           | SE   | CV   |
| 2005 | 2.65            | 0.77 | 0.29 | 1.63           | 0.38 | 0.24 | 1.58           | 1.08 | 0.68 |
| 2013 | 0.61            | 0.18 | 0.30 | 0.83           | 0.19 | 0.23 | 0.72           | 0.20 | 0.28 |
| 2014 | 1.62            | 0.43 | 0.26 | 1.41           | 0.25 | 0.18 | 1.37           | 0.28 | 0.20 |
| 2015 | 1.12            | 0.24 | 0.21 | 1.07           | 0.19 | 0.18 | 0.82           | 0.18 | 0.22 |
| 2016 | 1.07            | 0.27 | 0.25 | 1.19           | 0.22 | 0.18 | 1.24           | 0.27 | 0.22 |

583 **Figures**

584 Figure 1. The location of cheetah monitoring in the Masai Mara National Reserve (MMNR) in  
585 southwestern Kenya (35.125° E, 1.44° S). Other conservation areas (shaded) surround the  
586 MMNR, including the Serengeti National Park in Tanzania to the south. Map data ©  
587 OpenStreetMap contributors, CC BY-SA.

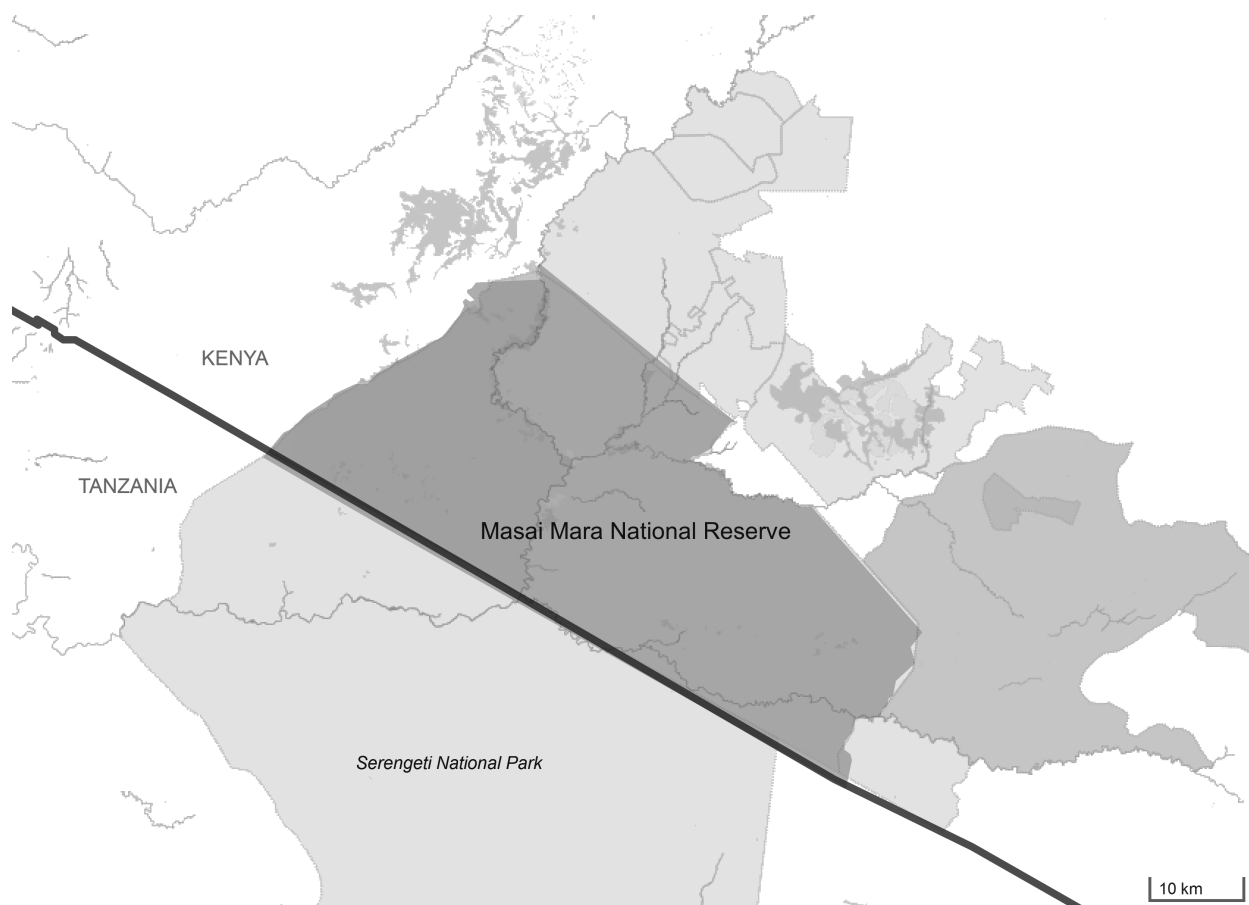



588 Figure 2. The midpoint ordinal date of encounter for each individual cheetah and the sampling  
589 periods in which they were encountered in the Masai Mara during 2005 and 2013–2016. Note,  
590 any individuals with encounters that spanned the full period (10 months) were included in the  
591 spatial capture-recapture models for all 3 periods.

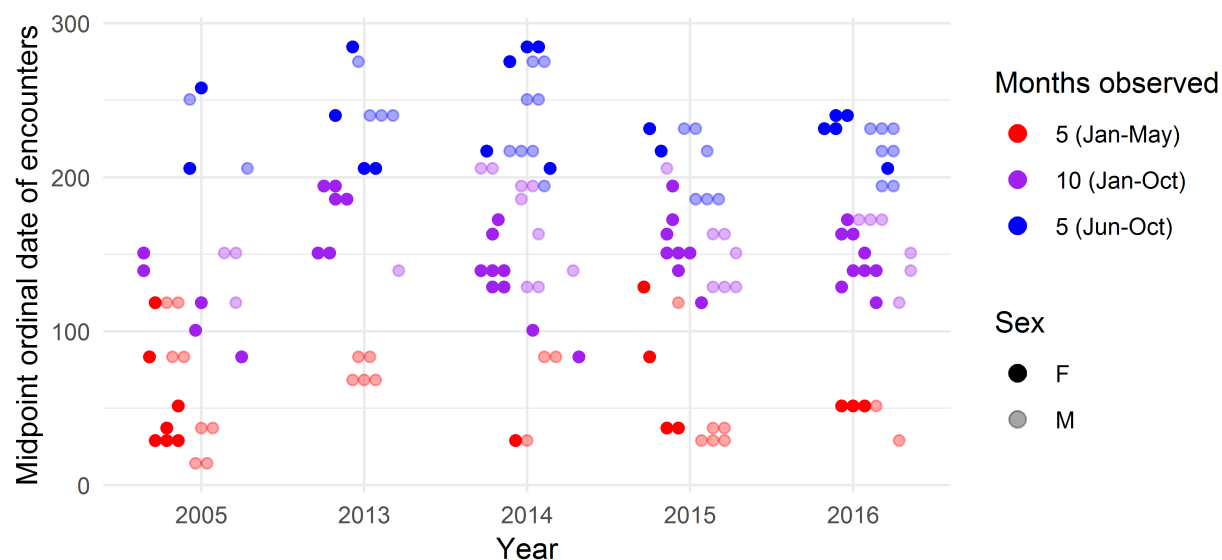

592 Figure 3. Mean estimates (with 95% CI) of cheetah density (#/100 km<sup>2</sup>) in the Masai Mara  
593 National Reserve in 2005 and 2013–2016 from spatial capture-recapture models fit using 5  
594 months (early and late periods) and 10 months of surveys.

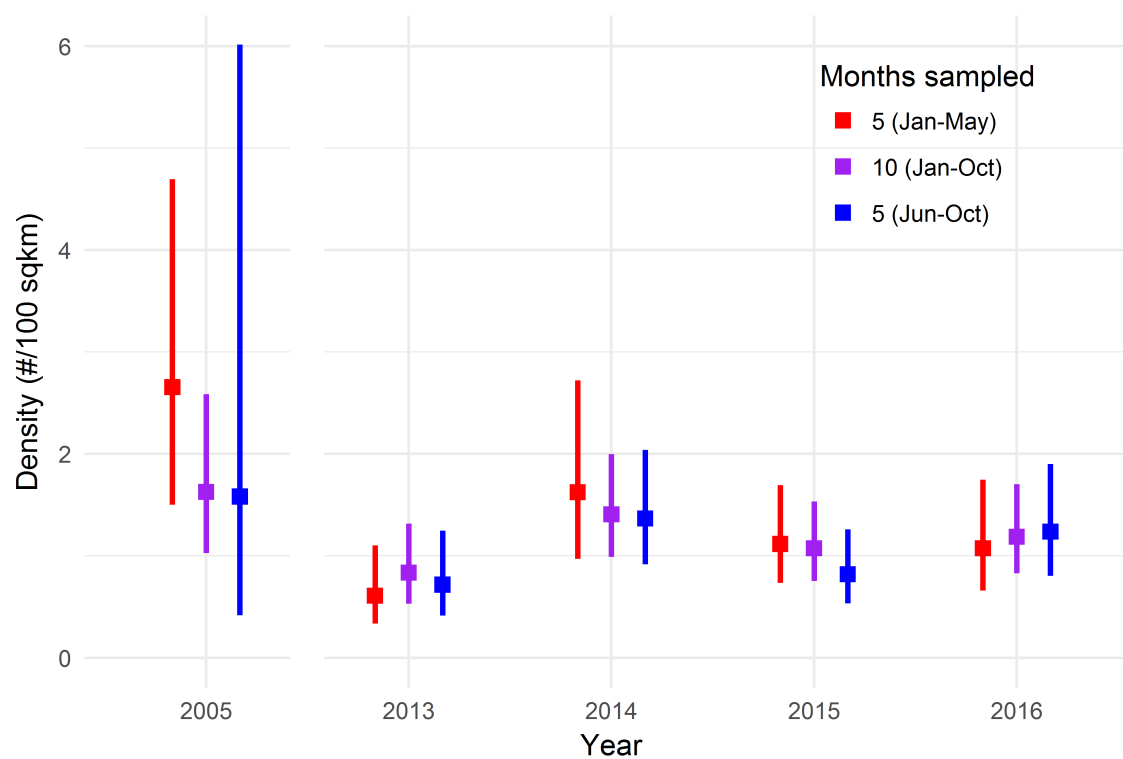

595 Figure 4. Relationship between number of spatially distinct encounters and coefficients of  
596 variation (CVs) for density estimates from the spatial capture-recapture models. Spatially  
597 distinct encounters occur across >1 grid cell and by definition involve recapture of an individual.

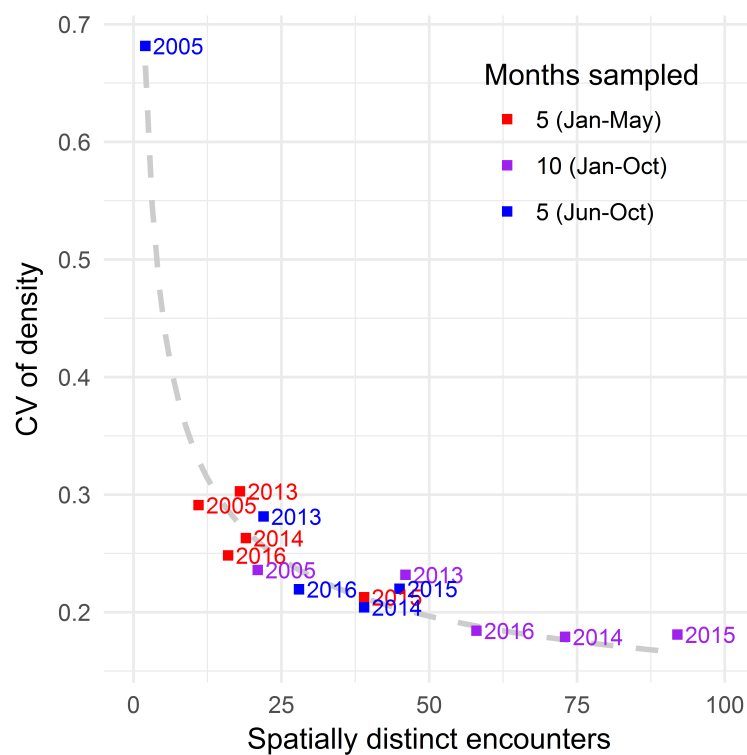

598 Figure 5. Predicted relationships (with 95% CI) between NDVI variance and cheetah encounter  
599 rate during 2005 and 2013–2016 from spatial capture-recapture models using 5 months (early  
600 and late periods) and 10 months of surveys. Values for NDVI variance were standardized to  
601 have mean 0 and unit variance within each year. Ticks at bottom indicate observed values at  
602 pixel locations within the MMNR.

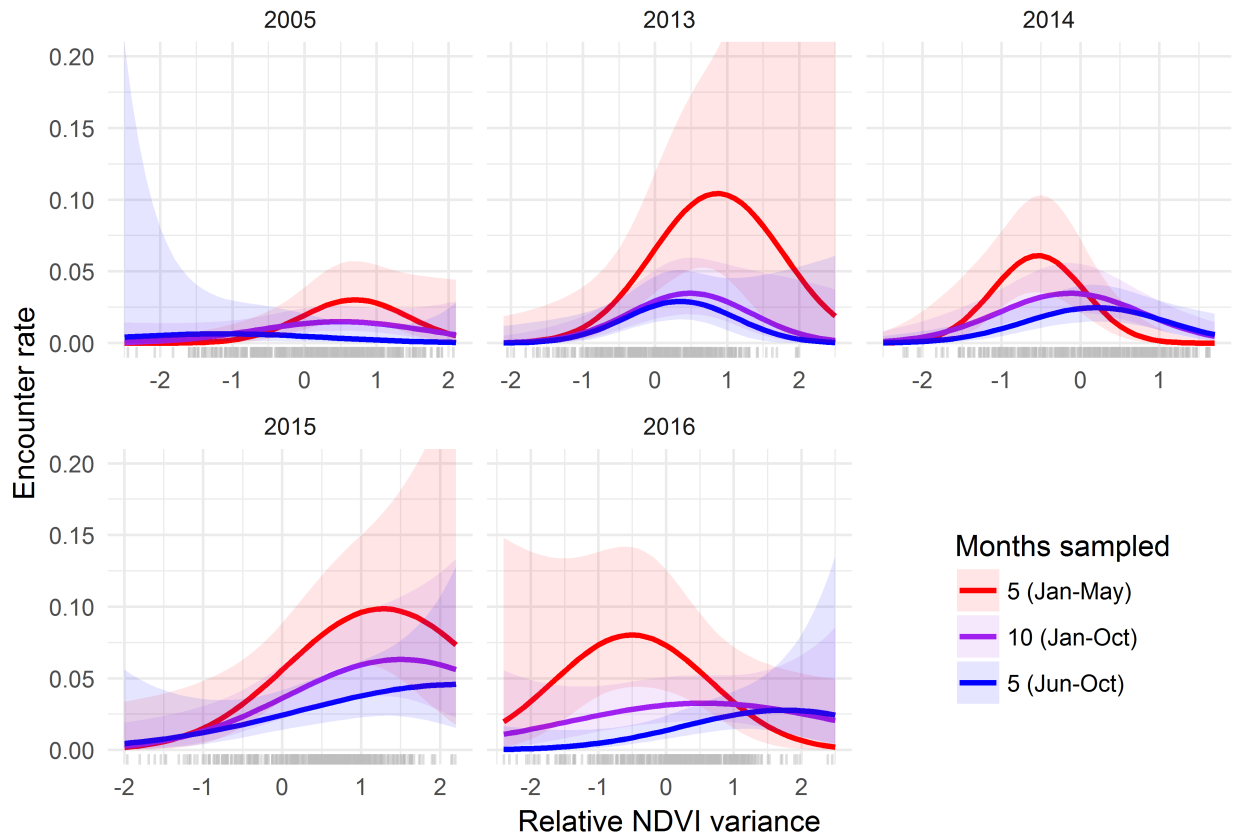

603 **Supplements**

604 Figure S1. Grid cells illustrating state space used in the spatial capture-recapture models, with  
605 delineations of blocks according to survey effort. Light gray cells occurred in areas not searched  
606 but included as a buffer for population estimation.

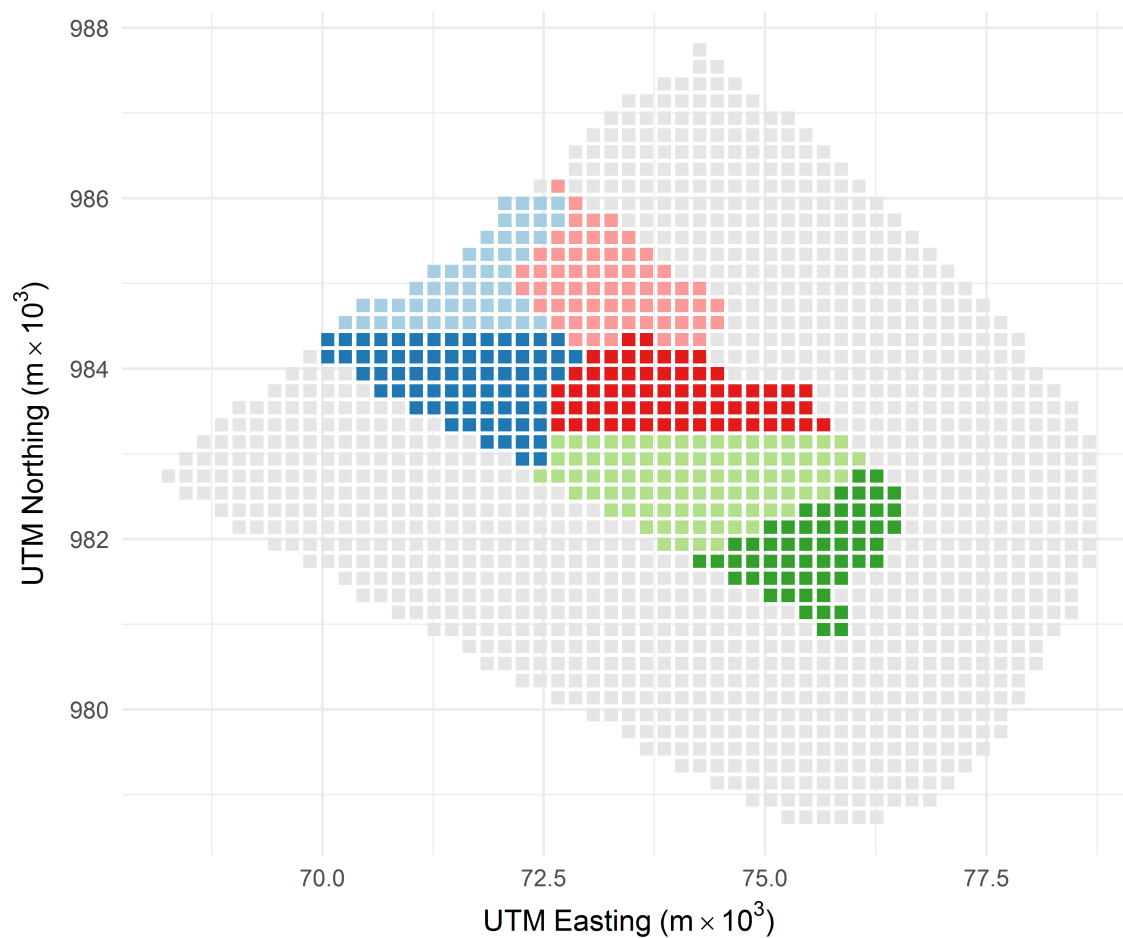

607 Figure S2. Spatial distributions of Normalized Vegetation Difference Index (NDVI) values in  
608 each year that served as covariates for encounter probability in the spatial capture-recapture  
609 models. Values represent the variance (standard deviation) in NDVI across the 36 satellite  
610 images (10-day intervals at 250 m resolution) for a given year. NDVI values were mean  
611 aggregated to the 2-km grid cells and standardized within each year to have mean of zero and  
612 unit variance. Satellite images acquired from the Famine Early Warning System Network  
613 hosted by the USGS/EROS Data Center (<https://earlywarning.usgs.gov/fews/>).

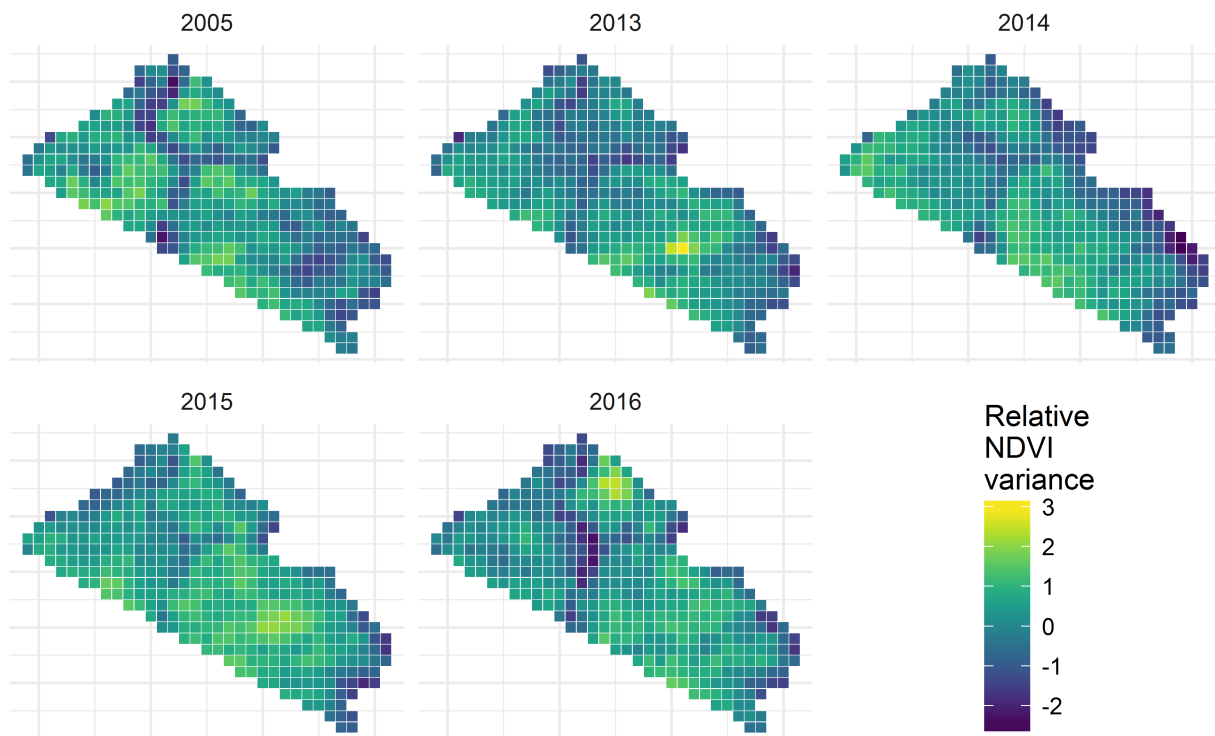

Source: https://www.biorxiv.org/content/10.1101/563122v1.full.pdf
